# Supplementary material for: The Genomic Medicine Center Karolinska 10-year report on genome sequencing for rare diseases and a strategy for stepwise clinical implementation
Source: Research Square preprint supplement (doi:10.21203/rs.3.rs-6790162/v1), 2025-06-17
Supplement: Supplementary file 1 [file 54ea845f284969c0985fd2dd.xlsx]

## Sheet: Index
Table S1	Intellectual Disability (ID panel)
Table S2	Neuromuscular, ataxia and spastic paraplegia disorders (NMD- panel)
Table S3	Inherited cancer (IC panel)
Table S4	Connective Tissue Disease (CTD panel)
Table S5	Neurodegenerative disorders (NeuroDeg panel)
Table S6	Skeletal dysplasia disorders (SKD panel)
Table S7	Inherited cardiac conditions (ICC panel)
Table S8	Non-immune hydrops fetalis panel
Table S9	Inborn errors of metabolism including mitochondrial disorders (IEM panel)
Table S10	Mitochondrial DNA (NBS-M panel)
Table S11	Monogenic diabetes (DIAB panel)
Table S12	Acute liver failure and cholestasis in children (PEDHEP panel)
Table S13	Epilepsy (EP panel)
Table S14	Primary Immunodeficiency (PID panel)
Table S15	Autoinflammation (AID panel)
Table S16	Inherited Bone Marrow Failure (IBMFS panel)
Table S17	Reported genes with diagnostic small variants
Table S18	Reported structural variants

## Sheet: Table S1_ID
AAAS
AARS1
ABAT
ABCA2
ABCC9
ABCD1
ABCD4
ABHD16A
ABHD5
ACAD9
ACADM
ACBD6
ACO2
ACOX1
ACSL4
ACTB
ACTG1
ACTL6A
ACTL6B
ACY1
ADAM22
ADAMTS10
ADAR
ADARB1
ADAT3
ADD1
ADD3
ADGRG1
ADGRL1
ADK
ADNP
ADSL
AFF2
AFF3
AFF4
AFG2A
AFG2B
AGA
AGMO
AGO1
AGO2
AGTPBP1
AHCY
AHDC1
AHI1
AIFM1
AIMP1
AJAP1
AKT3
ALDH18A1
ALDH3A2
ALDH4A1
ALDH5A1
ALDH7A1
ALG1
ALG11
ALG12
ALG13
ALG14
ALG3
ALG6
ALG8
ALG9
ALKBH8
ALMS1
AMER1
AMOTL1
AMPD2
AMT
ANK2
ANK3
ANKRD11
ANKRD17
ANO4
AP1B1
AP1G1
AP1S1
AP1S2
AP2M1
AP3B1
AP3B2
AP4B1
AP4E1
AP4M1
AP4S1
APC2
ARCN1
ARF1
ARF3
ARFGEF1
ARFGEF2
ARG1
ARHGAP35
ARHGEF9
ARID1A
ARID1B
ARID2
ARL13B
ARL6
ARMC9
ARPC4
ARSA
ARSB
ARSL
ARV1
ARX
ASAH1
ASCC3
ASH1L
ASL
ASNS
ASPA
ASPM
ASS1
ASTN1
ASXL1
ASXL2
ASXL3
ATAD1
ATAD3A
ATG4D
ATG7
ATIC
ATN1
ATP1A1
ATP1A2
ATP1A3
ATP2B1
ATP2B2
ATP5PO
ATP6AP1
ATP6AP2
ATP6V0A1
ATP6V0A2
ATP6V0C
ATP6V1A
ATP6V1B2
ATP7A
ATP8A2
ATP9A
ATR
ATRX
ATXN7L3
AUH
AUTS2
AXIN1
B3GALNT2
B3GLCT
B4GALNT1
B4GALT1
B4GALT7
B9D2
BAP1
BBS1
BBS10
BBS12
BBS2
BBS4
BBS5
BBS7
BBS9
BCAP31
BCAS3
BCKDHA
BCKDHB
BCKDK
BCL11A
BCL11B
BCOR
BCS1L
BHLHE22
BICRA
BLOC1S1
BLTP1
BMP4
BOLA3
BORCS8
BPTF
BRAF
BRAT1
BRD4
BRF1
BRPF1
BRSK2
BRWD3
BSCL2
BSND
BTD
BUB1B
C12orf57
C2CD3
C2orf69
CA2
CA8
CACHD1
CACNA1A
CACNA1B
CACNA1C
CACNA1D
CACNA1E
CACNA1G
CACNA1I
CACNA2D1
CACNA2D2
CAD
CAMK2A
CAMK2B
CAMK2D
CAMK4
CAMSAP1
CAMTA1
CAPN15
CAPRIN1
CAPZA2
CARS1
CARS2
CASK
CASP2
CBL
CBS
CBX1
CBY1
CC2D1A
CC2D2A
CCBE1
CCDC115
CCDC22
CCDC47
CCDC82
CCDC88A
CCDC88C
CCND2
CCT3
CCT6A
CDC42
CDC42BPB
CDH11
CDH2
CDK10
CDK13
CDK16
CDK19
CDK5RAP2
CDK8
CDKL5
CDON
CELF2
CELSR3
CENPF
CEP104
CEP120
CEP135
CEP152
CEP164
CEP290
CEP295
CEP41
CEP55
CEP57
CEP63
CEP76
CEP83
CEP85L
CERT1
CHAMP1
CHASERR
CHD1
CHD2
CHD3
CHD4
CHD5
CHD7
CHD8
CHKA
CHKB
CHMP1A
CIC
CIT
CKAP2L
CLCN3
CLCN4
CLCN6
CLCNKB
CLDN5
CLN3
CLN5
CLN6
CLN8
CLP1
CLPB
CLTC
CNBP
CNKSR2
CNNM2
CNOT1
CNOT2
CNOT3
CNOT9
CNPY3
CNTNAP1
CNTNAP2
COA8
COASY
COG1
COG4
COG5
COG6
COG7
COG8
COL18A1
COL4A1
COL4A2
COLEC11
COPB2
COQ4
COQ8A
COX10
COX11
COX15
CPAP
CPE
CPLANE1
CPS1
CPSF3
CRADD
CRB2
CREBBP
CRELD1
CRIPT
CRLS1
CRNKL1
CRPPA
CSDE1
CSMD1
CSNK1G1
CSNK2A1
CSNK2B
CSPP1
CTBP1
CTCF
CTDP1
CTNNA2
CTNNB1
CTR9
CTSA
CTSD
CTU2
CUL3
CUL4B
CUX1
CUX2
CWC27
CWF19L1
CYB5R3
CYFIP2
D2HGDH
DAG1
DAGLA
DARS1
DARS2
DBT
DCAF17
DCC
DCHS1
DCPS
DCX
DDB1
DDC
DDHD2
DDX11
DDX17
DDX23
DDX3X
DDX59
DDX6
DEAF1
DEGS1
DENND5A
DENND5B
DEPDC5
DHCR24
DHCR7
DHDDS
DHFR
DHPS
DHRSX
DHX30
DHX37
DHX9
DIAPH1
DIP2C
DIS3L2
DISP1
DKC1
DLD
DLG3
DLG4
DLL1
DMAP1
DMD
DMPK
DMXL2
DNAJC12
DNAJC19
DNM1
DNM1L
DNMT3A
DNMT3B
DOCK3
DOCK4
DOCK6
DOCK7
DOHH
DOLK
DOT1L
DPAGT1
DPF2
DPH1
DPH5
DPM1
DPM2
DPYS
DPYSL5
DRG1
DROSHA
DTYMK
DYM
DYNC1H1
DYNC1I2
DYRK1A
EARS2
EBF3
EBP
EDEM3
EED
EEF1A2
EEF1B2
EEF2
EEFSEC
EFTUD2
EHMT1
EIF2AK2
EIF2AK3
EIF2S3
EIF3F
EIF4A2
EIF4A3
EIF5A
ELAC2
ELOVL4
ELP2
EMC1
EMC10
EML1
ENTPD1
EP300
EP400
EPB41L3
EPG5
EPRS1
ERCC1
ERCC2
ERCC3
ERCC5
ERCC6
ERCC6L2
ERCC8
ERF
ERI1
ERLIN2
ESAM
ESCO2
ETFA
ETFB
ETFDH
ETHE1
EXOC7
EXOSC3
EXOSC8
EXT2
EXTL3
EZH1
EZH2
FAM149B1
FAM177A1
FAM20C
FAM50A
FAR1
FARS2
FARSA
FARSB
FASTKD2
FAT4
FBRSL1
FBXL3
FBXL4
FBXO11
FBXO28
FBXO31
FBXW11
FBXW7
FCSK
FDFT1
FDXR
FEM1B
FEM1C
FERRY3
FEZF2
FGD1
FGF12
FGF13
FGF14
FGFR1
FGFR3
FH
FIG4
FITM2
FKRP
FKTN
FLNA
FLVCR1
FLVCR2
FMN2
FMR1
FOLR1
FOSL2
FOXG1
FOXP1
FOXP2
FOXP4
FOXRED1
FRA10AC1
FRAS1
FRMD5
FRMPD4
FRRS1L
FRYL
FSD1L
FTO
FTSJ1
FUCA1
FUT8
FZR1
GABBR1
GABBR2
GABRA1
GABRA2
GABRA3
GABRA4
GABRA5
GABRB2
GABRB3
GABRD
GABRG2
GAD1
GALC
GALE
GALNT2
GALT
GAMT
GATA6
GATAD2A
GATAD2B
GATM
GCDH
GCH1
GCSH
GDI1
GEMIN4
GEMIN5
GFAP
GFER
GFM1
GFM2
GIGYF1
GJC2
GK
GLB1
GLDC
GLI2
GLI3
GLIS3
GLRA2
GLS
GLUL
GM2A
GMPPA
GMPPB
GNAI1
GNAO1
GNAS
GNB1
GNB2
GNB5
GNE
GNPAT
GNPTAB
GNPTG
GNS
GOLGA2
GON4L
GOT2
GPAA1
GPATCH11
GPC3
GPC4
GPRC5B
GPT2
GRIA1
GRIA2
GRIA3
GRIA4
GRID2
GRIK2
GRIN1
GRIN2A
GRIN2B
GRIN2D
GRM1
GRM7
GSS
GTF2H5
GTF3C3
GTF3C5
GTPBP1
GTPBP2
GTPBP3
GUSB
H1-4
H3-3A
H3-3B
H4C3
H4C5
H4C9
HACE1
HADHA
HADHB
HCCS
HCFC1
HCN1
HDAC3
HDAC4
HDAC8
HECTD4
HECW2
HEPACAM
HERC1
HERC2
HESX1
HEXA
HEXB
HGSNAT
HIBCH
HID1
HIKESHI
HIRA
HIVEP2
HK1
HLCS
HMBS
HMGB1
HMGCL
HNMT
HNRNPC
HNRNPD
HNRNPH1
HNRNPH2
HNRNPK
HNRNPR
HNRNPU
HOXA1
HPD
HPDL
HPRT1
HRAS
HS2ST1
HSD17B10
HSD17B4
HSPD1
HSPG2
HTRA2
HUWE1
HYCC1
IARS1
IBA57
IDH2
IDS
IDUA
IER3IP1
IFIH1
IFT172
IFT27
IFT74
IGF1
IGF1R
IKBKG
IL1RAPL1
IMPDH2
INPP4A
INPP5E
INPP5K
INTS1
INTS11
INTS13
IPO8
IQSEC1
IQSEC2
IREB2
IRF2BPL
IRX5
ISCA1
ISCA2
ITFG2
ITPA
ITPR1
ITSN1
IVD
JAM3
JARID2
JMJD1C
KANSL1
KARS1
KAT5
KAT6A
KAT6B
KAT8
KATNB1
KATNIP
KBTBD2
KCNA2
KCNA3
KCNB1
KCNB2
KCNC1
KCNC2
KCND1
KCND2
KCND3
KCNH1
KCNH5
KCNJ10
KCNJ6
KCNK4
KCNK9
KCNMA1
KCNN2
KCNN3
KCNQ2
KCNQ3
KCNQ5
KCNT1
KCNT2
KCTD3
KCTD7
KDM1A
KDM2A
KDM2B
KDM3B
KDM4B
KDM5A
KDM5B
KDM5C
KDM6A
KDM6B
KIAA0586
KICS2
KIDINS220
KIF11
KIF14
KIF1A
KIF21B
KIF26A
KIF2A
KIF4A
KIF5C
KIF7
KIFBP
KLF7
KLHL20
KLHL7
KMT2A
KMT2B
KMT2C
KMT2D
KMT2E
KMT5B
KNL1
KPTN
KRAS
L1CAM
L2HGDH
LAMA1
LAMA2
LAMB1
LAMB2
LAMP2
LARGE1
LARP1
LARP7
LARS1
LARS2
LAS1L
LETM1
LGI3
LHX2
LIAS
LIG4
LINC01412
LINGO4
LINS1
LIPT1
LMBRD1
LMBRD2
LMNB1
LMNB2
LNPK
LONP1
LRP2
LRPPRC
LRRC7
LSS
LTBP1
LYRM7
LZTFL1
LZTR1
MAB21L1
MAB21L2
MACF1
MADD
MAF
MAGEL2
MAN1B1
MAN2B1
MAN2C1
MANBA
MAOA
MAP1B
MAP2K1
MAP2K2
MAP4K4
MAPK1
MAPK8IP3
MAPKAPK5
MAPRE2
MARK2
MASP1
MAST1
MAST3
MAST4
MAT1A
MAX
MBD5
MBOAT7
MBTPS2
MCM3AP
MCM6
MCOLN1
MCPH1
MDH2
MECP2
MED11
MED12
MED12L
MED13
MED13L
MED16
MED17
MED23
MED25
MED27
MEF2C
MEGF8
MEIS2
METTL23
METTL5
MFF
MFSD2A
MFSD8
MGAT2
MICU1
MID1
MIR17HG
MKKS
MKS1
MLC1
MLYCD
MMAA
MMAB
MMACHC
MMADHC
MMUT
MN1
MOCS1
MOCS2
MOGS
MORC2
MPDU1
MPDZ
MPLKIP
MPV17
MRAS
MRPL49
MRPS22
MRPS34
MSL2
MSL3
MSMO1
MTFMT
MTHFR
MTHFS
MTO1
MTOR
MTR
MTRFR
MTRR
MTSS2
MVK
MYCBP2
MYCN
MYH10
MYO5A
MYT1L
NAA10
NAA15
NAA20
NACC1
NAE1
NAGA
NAGLU
NALCN
NANS
NAPB
NARS1
NAV3
NBEA
NCAPD2
NCDN
NCKAP1
NDC1
NDE1
NDP
NDST1
NDUFA1
NDUFA2
NDUFAF1
NDUFS1
NDUFS4
NDUFS7
NDUFS8
NDUFV1
NEDD4L
NEMF
NEU1
NEUROD2
NEUROG1
NEXMIF
NF1
NFASC
NFIA
NFIB
NFIX
NFU1
NGLY1
NHS
NIPBL
NKAP
NKX2-1
NLGN3
NLGN4X
NONO
NOTCH1
NOTCH3
NOVA2
NPC1
NPC2
NPHP1
NPHP3
NR2F1
NR2F2
NR4A2
NRAS
NRCAM
NRROS
NRXN1
NSD1
NSD2
NSDHL
NSRP1
NSUN2
NSUN6
NT5C2
NTNG2
NTRK1
NTRK2
NUBPL
NUDT2
NUP188
NUP214
NUS1
OCLN
OCRL
ODC1
OFD1
OGDH
OGDHL
OGT
OPA3
OPHN1
OSGEP
OTC
OTUD5
OTUD6B
OTX2
OXR1
P4HTM
PABPC1
PACS1
PACS2
PAFAH1B1
PAH
PAK1
PAK2
PAK3
PALS1
PAM16
PAN2
PARN
PARP6
PAX5
PAX6
PAX8
PBX1
PC
PCBP2
PCCA
PCCB
PCDH12
PCDH19
PCDHGC4
PCGF2
PCYT2
PDE10A
PDE4D
PDE6D
PDGFRB
PDHA1
PDHB
PDHX
PDP1
PDSS1
PDZD8
PEPD
PET100
PEX1
PEX10
PEX11B
PEX12
PEX13
PEX14
PEX16
PEX19
PEX2
PEX26
PEX3
PEX5
PEX6
PEX7
PGAP1
PGAP2
PGAP3
PGK1
PGM2L1
PGM3
PHACTR1
PHF21A
PHF5A
PHF6
PHF8
PHGDH
PHIP
PI4K2A
PI4KA
PIBF1
PIDD1
PIGA
PIGB
PIGC
PIGG
PIGH
PIGK
PIGL
PIGN
PIGO
PIGP
PIGQ
PIGS
PIGT
PIGU
PIGV
PIGW
PIK3C2A
PIK3CA
PIK3R2
PIP5K1C
PISD
PITRM1
PLA2G6
PLAA
PLAAT3
PLCB1
PLK1
PLK4
PLP1
PLPBP
PLXNA1
PLXNB2
PMM2
PMPCA
PMPCB
PNKP
PNPLA6
PNPLA8
PNPT1
POGZ
POLA1
POLG
POLR1A
POLR1C
POLR2A
POLR3A
POLR3B
POLR3K
POLRMT
POMGNT1
POMGNT2
POMK
POMT1
POMT2
PORCN
POU3F2
POU3F3
PPFIA3
PPFIBP1
PPIL1
PPM1D
PPP1CB
PPP1R12A
PPP1R21
PPP1R3F
PPP2CA
PPP2R1A
PPP2R5C
PPP2R5D
PPP3CA
PPT1
PQBP1
PRDM13
PRKACB
PRKAR1A
PRKAR1B
PRMT7
PRODH
PRPF19
PRPF8
PRPS1
PRR12
PRUNE1
PSAP
PSMC3
PSMC5
PSMD11
PSMD12
PSMF1
PSPH
PTCD3
PTCH1
PTCHD1
PTDSS1
PTEN
PTF1A
PTPN11
PTPN23
PTPN4
PTRH2
PTRHD1
PTS
PUF60
PUM1
PURA
PUS1
PUS3
PUS7
PYCR1
PYCR2
QARS1
QDPR
QRICH1
RAB11A
RAB11B
RAB18
RAB23
RAB39B
RAB3GAP1
RAB3GAP2
RAB5C
RABGAP1
RAC1
RAC3
RAD21
RAF1
RAI1
RALA
RALGAPA1
RAP1B
RAP1GDS1
RARB
RARS1
RARS2
RBBP5
RBBP8
RBFOX1
RBL2
RBM10
RBSN
RELN
RERE
RFC4
RFT1
RFX3
RFX4
RFX7
RHEB
RHOBTB2
RICTOR
RIT1
RLIM
RMND1
RNASEH2A
RNASEH2B
RNASEH2C
RNASET2
RNF113A
RNF125
RNF13
RNF220
RNU12
RNU2-2
RNU4-2
RNU4ATAC
RNU5B-1
RNU7-1
ROBO1
ROGDI
ROR2
RORA
RPGRIP1L
RPH3A
RPIA
RPL10
RPS6KA3
RRAS2
RRM2B
RSRC1
RTEL1
RTN4IP1
RTTN
RUNX1T1
RXYLT1
SAMD9
SAMHD1
SARS1
SARS2
SART3
SASS6
SATB1
SATB2
SBF1
SC5D
SCAF4
SCAMP5
SCAPER
SCN1A
SCN1B
SCN2A
SCN3A
SCN8A
SCO2
SDCCAG8
SDHA
SDHAF1
SECISBP2
SEL1L
SEMA6B
SEPHS1
SEPSECS
SERAC1
SET
SETBP1
SETD1A
SETD1B
SETD2
SETD5
SF3B1
SFXN4
SGPL1
SGSH
SGSM3
SHANK1
SHANK2
SHANK3
SHH
SHMT2
SHOC2
SIAH1
SIK1
SIL1
SIN3A
SIN3B
SIX3
SKI
SKIC3
SLC12A2
SLC12A5
SLC12A6
SLC12A9
SLC13A5
SLC16A2
SLC17A5
SLC18A2
SLC19A3
SLC1A2
SLC1A4
SLC25A1
SLC25A12
SLC25A15
SLC25A22
SLC2A1
SLC30A9
SLC32A1
SLC33A1
SLC35A2
SLC35C1
SLC38A3
SLC39A14
SLC39A8
SLC45A1
SLC46A1
SLC4A10
SLC4A4
SLC5A6
SLC6A1
SLC6A19
SLC6A3
SLC6A8
SLC6A9
SLC9A6
SLF2
SLITRK2
SMAD4
SMARCA2
SMARCA4
SMARCA5
SMARCB1
SMARCC2
SMARCD1
SMARCE1
SMC1A
SMC3
SMC5
SMG8
SMG9
SMOC1
SMPD1
SMPD4
SMS
SNAP25
SNAP29
SNAPC4
SNF8
SNORD118
SNRPB
SNX14
SNX27
SOD1
SON
SOS1
SOS2
SOX10
SOX11
SOX2
SOX4
SOX5
SOX6
SP9
SPART
SPECC1L
SPEN
SPG11
SPOP
SPR
SPRED1
SPRED2
SPTAN1
SPTBN1
SPTBN2
SPTBN4
SRCAP
SRD5A3
SRPK3
SRRM2
SRSF1
SSR4
ST3GAL3
ST3GAL5
STAG1
STAG2
STAMBP
STEEP1
STIL
STRA6
STRADA
STT3A
STX1A
STX1B
STXBP1
SUCLA2
SUCLG1
SUFU
SUMF1
SUOX
SUPT16H
SURF1
SUZ12
SVBP
SYN1
SYNCRIP
SYNGAP1
SYNJ1
SYP
SYT1
SZT2
TAB2
TAF1
TAF2
TAF4
TAF6
TAF8
TAFAZZIN
TANC2
TANGO2
TAOK1
TAOK2
TARS2
TASP1
TAT
TBC1D20
TBC1D23
TBC1D24
TBC1D2B
TBC1D7
TBCD
TBCE
TBCK
TBL1XR1
TBR1
TBX1
TCEAL1
TCF20
TCF4
TCF7L2
TCN2
TCP1
TCTN1
TCTN2
TCTN3
TDP2
TECPR2
TEFM
TELO2
TENM3
TERT
TET3
TFE3
TGIF1
TH
THOC2
THOC6
THRA
THUMPD1
TIAM1
TIMM50
TINF2
TLK2
TMCO1
TMEM106B
TMEM147
TMEM163
TMEM165
TMEM216
TMEM218
TMEM222
TMEM237
TMEM240
TMEM63B
TMEM63C
TMEM67
TMEM70
TMEM94
TMTC3
TMX2
TNPO2
TNR
TNRC6B
TOE1
TOGARAM1
TP73
TPP1
TPP2
TRA2B
TRAF7
TRAIP
TRAK1
TRAPPC10
TRAPPC11
TRAPPC12
TRAPPC4
TRAPPC6B
TRAPPC9
TREX1
TRIM8
TRIO
TRIP12
TRIT1
TRMT1
TRMT10A
TRNT1
TRPM3
TRPM7
TRRAP
TSC1
TSC2
TSEN15
TSEN2
TSEN54
TSFM
TSHB
TSPOAP1
TTC19
TTC5
TTC8
TTI1
TTI2
TUBA1A
TUBB
TUBB2A
TUBB2B
TUBB3
TUBB4A
TUBG1
TUBGCP2
TUBGCP6
TUSC3
TWIST1
U2AF2
UBA5
UBAP2L
UBE2A
UBE3A
UBE3B
UBE3C
UBE4A
UBR1
UBR5
UBR7
UBTF
UFC1
UFM1
UFSP2
UGDH
UGP2
UMPS
UNC13A
UNC79
UNC80
UPB1
UPF3B
USP18
USP27X
USP7
USP9X
VAMP2
VARS1
VARS2
VCP
VIPAS39
VLDLR
VPS11
VPS13B
VPS16
VPS33B
VPS35L
VPS41
VPS4A
VPS50
VPS53
VRK1
WAC
WARS1
WARS2
WASF1
WASHC4
WBP4
WDFY3
WDPCP
WDR11
WDR26
WDR37
WDR4
WDR44
WDR45
WDR45B
WDR47
WDR5
WDR62
WDR73
WDR81
WDR83OS
WIPI2
WNK3
WNT1
WNT5A
WWOX
XPA
XRCC4
XYLT1
YARS1
YIF1B
YWHAE
YWHAG
YY1
ZBTB11
ZBTB18
ZBTB20
ZBTB24
ZBTB47
ZBTB7A
ZC4H2
ZDHHC9
ZEB2
ZFHX3
ZFHX4
ZFTRAF1
ZFX
ZFYVE26
ZIC1
ZIC2
ZMIZ1
ZMYM2
ZMYM3
ZMYND11
ZMYND8
ZNF142
ZNF148
ZNF292
ZNF335
ZNF462
ZNF526
ZNF699
ZNF711
ZNHIT3
ZNRF3
ZRSR2
ZSCAN10
ZSWIM6

## Sheet: Table S2_NMD
AAAS
AARS1
AARS2
ABAT
ABCA1
ABCB7
ABCD1
ABHD12
ABHD16A
ABHD5
ACAD9
ACADM
ACADVL
ACBD5
ACBD6
ACER3
ACO2
ACOX1
ACP5
ACTA1
ACTB
ACTC1
ACTN2
ADAMTS10
ADAMTS15
ADAR
ADCY5
ADCY6
ADGRG1
ADGRG6
ADPRS
ADSS1
AFG2B
AFG3L2
AGL
AGRN
AGTPBP1
AGXT
AHI1
AIFM1
AIMP1
ALDH18A1
ALDH3A2
ALDH5A1
ALDOA
ALG1
ALG11
ALG12
ALG14
ALG2
ALG3
ALG6
ALG8
ALG9
ALS2
AMFR
AMPD1
AMPD2
ANG
ANO10
ANO3
ANO5
ANTXR2
ANXA11
AP1S2
AP4B1
AP4E1
AP4M1
AP4S1
AP5Z1
APOA1
APP
APTX
AR
ARFGEF3
ARG1
ARL13B
ARL6IP1
ARMC9
ARSA
ARX
ASAH1
ASCC1
ASCC3
ASL
ASPA
ASXL1
ATAD3A
ATCAY
ATG7
ATL1
ATL3
ATM
ATN1
ATP13A2
ATP1A1
ATP1A2
ATP1A3
ATP2A1
ATP2B3
ATP5MC3
ATP6AP1
ATP6V0A1
ATP6V0A2
ATP7A
ATP7B
ATP8A2
ATXN1
ATXN10
ATXN2
ATXN3
ATXN7
ATXN8OS
AUH
B3GALNT2
B3GALT6
B3GAT3
B3GLCT
B4GALNT1
B4GALT1
B4GALT7
B4GAT1
B9D2
BAG3
BBS1
BCAP31
BCAS3
BCKDHB
BCS1L
BEAN1
BET1
BICD2
BIN1
BLOC1S1
BLTP1
BOLA3
BRF1
BSCL2
C19orf12
C2CD3
C2orf69
C9orf72
CA8
CACNA1A
CACNA1E
CACNA1G
CACNA1S
CACNA2D2
CACNB4
CAD
CADM3
CAMK4
CAMTA1
CAPN1
CAPN3
CASK
CAV3
CAVIN1
CBY1
CC2D2A
CCDC115
CCNF
CD59
CENPF
CEP104
CEP290
CEP41
CFAP276
CFL2
CHAT
CHCHD10
CHCHD2
CHKB
CHMP1A
CHMP2B
CHRNA1
CHRNB1
CHRND
CHRNE
CHRNG
CHST14
CHST3
CHST6
CHSY1
CIC
CILK1
CLCN1
CLCN2
CLDN11
CLDN5
CLN3
CLN5
CLN6
CLP1
CLPB
CLPP
CNBP
CNTNAP1
COA7
COA8
COASY
COG1
COG4
COG5
COG6
COG7
COG8
COL12A1
COL13A1
COL25A1
COL4A1
COL4A2
COL6A1
COL6A2
COL6A3
COLGALT1
COLQ
COQ2
COQ4
COQ7
COQ8A
COX10
COX15
COX20
COX6A1
COX6A2
CP
CPLANE1
CPOX
CPT1C
CPT2
CRB2
CRLF1
CRPPA
CRYAB
CSF1R
CSGALNACT1
CSPP1
CSTB
CTBP1
CTC1
CTDP1
CTNNB1
CTSA
CTSF
CWF19L1
CYP27A1
CYP2U1
CYP7B1
D2HGDH
DAB1
DAG1
DAGLA
DARS1
DARS2
DBH
DCAF17
DCTN1
DDB2
DDC
DDHD1
DDHD2
DDX3X
DDX59
DEGS1
DES
DGUOK
DHCR24
DHCR7
DHDDS
DHFR
DHTKD1
DHX9
DKC1
DLAT
DLD
DLG4
DMD
DMPK
DNAJB2
DNAJB4
DNAJB6
DNAJC12
DNAJC19
DNAJC3
DNAJC5
DNAJC6
DNAJC7
DNM2
DNMT1
DOCK3
DOK7
DOLK
DPAGT1
DPM1
DPM2
DPM3
DPYD
DPYSL5
DRP2
DST
DTNA
DYNC1H1
DYSF
EARS2
EBF3
EBP
ECEL1
ECHS1
EDEM3
EGR2
EIF2AK2
EIF2B1
EIF2B2
EIF2B3
EIF2B4
EIF2B5
ELOVL1
ELOVL4
ELP1
EMD
ENO3
ENTPD1
EOGT
EPG5
EPM2A
EPRS1
ERBB3
ERBB4
ERCC4
ERCC5
ERCC6
ERCC8
ERGIC1
ERLIN1
ERLIN2
ESAM
ETFA
ETFB
ETFDH
ETHE1
EVC
EVC2
EXOC3L2
EXOSC3
EXOSC8
EXOSC9
EXT1
EXT2
FA2H
FAH
FAM20C
FAR1
FARS2
FARSA
FARSB
FBLN5
FBN2
FBXL4
FBXO7
FDX2
FEM1C
FGD4
FGF14
FGFR2
FGFR3
FHL1
FICD
FIG4
FILIP1
FITM2
FKBP10
FKBP14
FKRP
FKTN
FLAD1
FLNA
FLNB
FLNC
FLVCR1
FLVCR2
FMR1
FOLR1
FOXG1
FOXP2
FOXRED1
FRMD5
FTL
FUCA1
FUS
FUT8
FXN
FXR1
G6PC3
GAA
GALC
GALNT2
GALNT3
GAN
GARS1
GBA1
GBA2
GBE1
GBF1
GCDH
GCH1
GDAP1
GEMIN5
GFAP
GFM1
GFPT1
GGPS1
GIPC1
GJA1
GJB1
GJC2
GLA
GLB1
GLDN
GLE1
GLI3
GLRA1
GLRB
GLRX5
GLS
GM2A
GMPPA
GMPPB
GNAL
GNAO1
GNB1
GNB4
GNE
GOLGA2
GORAB
GOSR2
GPAA1
GPT2
GRID2
GRIN1
GRM1
GRN
GSN
GTPBP2
GYG1
GYS1
HACD1
HACE1
HADHA
HADHB
HARS1
HCFC1
HECTD4
HECW2
HEPACAM
HEXA
HEXB
HIBCH
HIKESHI
HINT1
HK1
HMBS
HMGCR
HNRNPA1
HNRNPA2B1
HNRNPDL
HNRNPH1
HPCA
HPDL
HPRT1
HSD17B10
HSD17B4
HSPB1
HSPB8
HSPD1
HSPG2
HTRA1
HTRA2
HTT
HYCC1
HYLS1
IARS2
IBA57
IFIH1
IFT74
IGHMBP2
IMPDH2
INF2
INPP5E
INPP5K
INTS11
IRF2BPL
IRF6
ISCA1
ISCA2
ISCU
ISG15
ITGA7
ITM2B
ITPR1
ITPR3
IVD
JAG2
JAM3
JPH3
KAT6B
KBTBD13
KCNA1
KCNA2
KCNC3
KCND3
KCNJ10
KCNJ2
KCNK3
KCNMA1
KCNN2
KCNQ2
KCTD17
KDM5C
KIAA0586
KIAA0753
KIDINS220
KIF1A
KIF1C
KIF21A
KIF5A
KIF7
KLHL40
KLHL41
KLHL7
KMT2B
KPNA3
KY
L1CAM
L2HGDH
LAMA1
LAMA2
LAMB1
LAMP2
LARGE1
LARS2
LDB3
LDHA
LETM1
LGI3
LGI4
LIG3
LITAF
LMNA
LMNB1
LMOD3
LMX1B
LPIN1
LRP12
LRP4
LRPPRC
LRRK2
LRSAM1
LYRM7
LYST
MACF1
MAG
MAGEL2
MAGT1
MAN1B1
MAOA
MAP3K20
MAPK8IP3
MAPT
2025-03-02
MATR3
MCM3AP
MCOLN1
MECR
MED12
MED27
MEF2C
MEGF10
MFN2
MGAT2
MICU1
MINPP1
MKS1
MLC1
MLIP
MMACHC
MME
MMUT
MOGS
MORC2
MPDU1
MPI
MPLKIP
MPV17
MPZ
MRE11
MSTO1
MT-ATP6
MT-ATP8
MT-CO1
MT-CO2
MT-ND1
MT-ND6
MT-RNR1
MT-TL1
MTCL1
MTFMT
MTHFR
MTM1
MTMR2
MTRFR
MTTP
MUSK
MVK
MYBPC1
MYH14
MYH2
MYH3
MYH7
MYH8
MYL1
MYL2
MYMK
MYO18B
MYO9A
MYOD1
MYORG
MYOT
MYPN
NAA60
NAGA
NALCN
NAXD
NAXE
NDC1
NDRG1
NDUFA1
NDUFA10
NDUFA12
NDUFA2
NDUFAF1
NDUFAF2
NDUFAF3
NDUFAF5
NDUFAF6
NDUFS1
NDUFS2
NDUFS4
NDUFS7
NDUFS8
NDUFV1
NEB
NEFH
NEFL
NEK1
NEK9
NEMF
NFASC
NFU1
NGF
NGLY1
NHLRC1
NIPA1
NKX2-1
NKX6-2
NOP56
NOTCH3
NPC1
NPC2
NPHP1
NPHP3
NPTX1
NRROS
NSRP1
NT5C2
NTRK1
NUBPL
NUP188
NUP54
NUS1
OBSCN
OCLN
OFD1
OGDHL
OPA1
OPA3
OPHN1
OPTN
ORAI1
PABPN1
PACS2
PAFAH1B1
PAH
PANK2
PARK7
PAX6
PAX7
PCCA
PCCB
PCYT2
PDE10A
PDE2A
PDGFB
PDGFRB
PDHA1
PDHX
PDK3
PDP1
PDXK
PDYN
PET100
PEX1
PEX10
PEX11B
PEX12
PEX13
PEX14
PEX16
PEX19
PEX2
PEX26
PEX3
PEX5
PEX6
PEX7
PFKM
PFN1
PGAM2
PGAP2
PGAP3
PGK1
PGM1
PGM3
PHKA1
PHOX2B
PHYH
PI4KA
PIBF1
PIEZO2
PIGA
PIGB
PIGL
PIGM
PIGN
PIGO
PIGS
PIGT
PIGV
PIGW
PINK1
PIP5K1C
PITRM1
PLA2G6
PLEC
PLEKHG5
PLOD1
PLOD2
PLP1
PMM2
PMP2
PMP22
PMPCA
PMPCB
PNKD
PNKP
PNPLA2
PNPLA6
PNPT1
POGLUT1
POLG
POLG2
POLR1C
POLR3A
POLR3B
POMGNT1
POMGNT2
POMK
POMT1
POMT2
POPDC1
POPDC3
POR
POU4F1
PPFIBP1
PPOX
PPP2R2B
PPP2R5D
PRDM12
PRDM13
PRDX3
PRG4
PRKAG2
PRKCG
PRKN
PRKRA
PRNP
PRPS1
PRRT2
PRX
PSAP
PSEN1
PSEN2
PTEN
PTF1A
PTPN11
PTRH2
PTRHD1
PTS
PUM1
PYCR2
PYGM
PYROXD1
QDPR
RAB11B
RAB39B
RAB3GAP2
RAB7A
RAPSN
RARS1
RARS2
RBCK1
REEP1
REEP2
RELN
RETREG1
RFC1
RFT1
RIPK4
RNASEH2A
RNASEH2B
RNASEH2C
RNASET2
RNF170
RNF216
RNF220
RNU7-1
ROBO3
RORA
RPGRIP1L
RPIA
RRM2B
RTN2
RXYLT1
RYR1
RYR3
SACS
SAMD9L
SAMHD1
SARS1
SBF1
SBF2
SCAF4
SCARB2
SCARF2
SCLT1
SCN10A
SCN11A
SCN1A
SCN2A
SCN4A
SCN8A
SCN9A
SCO1
SCO2
SCP2
SCYL1
SDHA
SDHAF1
SDHB
SEC23B
SELENON
SEPSECS
SEPTIN9
SERAC1
SETX
SGCA
SGCB
SGCD
SGCE
SGCG
SH3TC2
SHQ1
SIGMAR1
SIL1
SKI
SLC12A6
SLC16A2
SLC17A5
SLC18A2
SLC18A3
SLC19A3
SLC1A3
SLC1A4
SLC20A2
SLC22A5
SLC25A1
SLC25A12
SLC25A15
SLC25A19
SLC25A4
SLC25A46
SLC29A3
SLC2A1
SLC30A10
SLC30A9
SLC35A1
SLC35A2
SLC35A3
SLC35C1
SLC35D1
SLC37A4
SLC39A14
SLC39A8
SLC44A1
SLC52A2
SLC52A3
SLC5A6
SLC5A7
SLC6A3
SLC6A8
SLC6A9
SLC9A1
SLC9A6
SMAD3
SMAD4
SMCHD1
SMN1
SMPD4
SMPX
SNAP25
SNCA
SNORD118
SNX14
SOD1
SORD
SOX10
SPART
SPAST
SPEG
SPG11
SPG21
SPG7
SPR
SPTAN1
SPTBN2
SPTBN4
SPTLC1
SPTLC2
SQSTM1
SRD5A3
SS18L1
SSR4
ST3GAL3
ST3GAL5
STAC3
STIM1
STN1
STT3A
STUB1
SUCLA2
SUCLG1
SUFU
SUMF1
SUOX
SURF1
SYNE1
SYNGAP1
SYNJ1
SYT1
SYT2
TACO1
TAF1
TAF8
TAMM41
TANGO2
TARDBP
TARS2
TBC1D23
TBC1D24
TBK1
TBP
TCAP
TCTN1
TCTN2
TCTN3
TDP1
TDP2
TECPR2
TFG
TGFB2
TGFB3
TGFBR1
TGFBR2
TGM6
TH
THAP1
THAP11
THG1L
TIA1
TIMM8A
TINF2
TK2
TMEM106B
TMEM107
TMEM138
TMEM151A
TMEM165
TMEM199
TMEM216
TMEM218
TMEM231
TMEM237
TMEM240
TMEM63A
TMEM63C
TMEM67
TNNC2
TNNI2
TNNT1
TNNT3
TNPO3
TOE1
TOGARAM1
TOR1A
TOR1AIP1
TPK1
TPM2
TPM3
TPP1
TRAPPC11
TRDN
TREM2
TREX1
TRIM2
TRIM32
TRIP4
TRPA1
TRPV4
TSEN2
TSEN34
TSEN54
TSFM
TSPOAP1
TTBK2
TTC19
TTN
TTPA
TTR
TUBA1A
TUBA4A
TUBB2B
TUBB3
TUBB4A
TUFM
TUSC3
TWNK
TXNDC15
TYMP
TYROBP
UBA1
UBA5
UBAP1
UBQLN2
UBTF
UCHL1
UFM1
UNC45B
USP18
VAC14
VAMP1
VAMP2
VAPB
VCP
VIPAS39
VLDLR
VMA21
VPS11
VPS13A
VPS13B
VPS13D
VPS16
VPS33B
VPS35
VPS41
VPS4A
VPS53
VRK1
VWA1
WARS1
WARS2
WASHC5
WDR45
WDR45B
WDR73
WDR81
WFS1
WNK1
WWOX
XK
XPA
XPC
XPR1
XRCC1
XYLT1
XYLT2
YARS1
YIF1B
YY1
ZC4H2
ZFHX3
ZFYVE26
ZMPSTE24
ZSWIM6

## Sheet: Table S3_IC
AIP
ALK
ANKRD26
APC
ATM
AXIN2
BAP1
BARD1
BICC1
BLM
BMPR1A
BRAF
BRCA1
BRCA2
BRIP1
BUB1B
CBL
CD70
CDC73
CDH1
CDK4
CDKN1B
CDKN1C
CDKN2A
CEBPA
CEP57
CHEK2
CTNNA1
CTR9
CYLD
DDB2
DDX41
DICER1
DIS3L2
DKC1
EFL1
EGFR
ELANE
EPCAM
ERCC1
ERCC2
ERCC3
ERCC4
ERCC5
ETV6
EXO1
EXT1
EXT2
EZH2
FAM111B
FANCA
FANCB
FANCC
FANCD2
FANCE
FANCF
FANCG
FANCI
FANCL
FANCM
FH
FLCN
GALNT12
GATA2
GPC3
GPR101
GREM1
HAVCR2
HNF1A
HOXB13
HRAS
IKZF1
KIF1B
KIT
KITLG
KRAS
LZTR1
MAP2K1
MAP2K2
MAX
MBD4	AR
MEN1
MET
MITF
MLH1
MLH3
MRE11
MSH2
MSH3
MSH6
MUTYH
NBN
NF1
NF2
NRAS
NSD1
NSUN2
NTHL1
PALB2
PAX5
PDGFRA
PHOX2B
PMS1
PMS2
POLD1
POLE
POLH
POT1
PPM1D
PRF1
PRKAR1A
PTCH1
PTEN
PTPN11
RAD50
RAD51C
RAD51D
RAF1
RASA2
RB1
RECQL
RECQL4
REST
RET
RHBDF2
RIT1
RPS20
RRAS
RUNX1
SAMD9
SAMD9L
SBDS
SDHA
SDHAF2
SDHB
SDHC
SDHD
SHOC2
SLX4
SMAD4
SMARCA4
SMARCB1
SMARCE1
SMO
SOS1
SOS2
SPRED1
SRP72
STK11
SUFU
TERC
TERT
TINF2
TMEM127
TP53
TRIM28
TRIP13
TSC1
TSC2
VHL
WRN
WT1
XPA
XPC
XRCC2

## Sheet: Table S4_CTD
ABCC6
ABL1
ACTA2
ACTG2
ACVR1
ADA2
ADAMTS10
ADAMTS17
ADAMTS2
ADAMTSL4
AEBP1
ALDH18A1
APC2
ARIH1
ASPH
ATP6V0A2
ATP6V1A
ATP6V1E1
ATP7A
B3GALT6
B3GAT3
B4GALT7
BGN
BMP1
BMP2
C1R
C1S
CBS
CHST14
COL11A1
COL11A2
COL12A1
COL18A1
COL1A1
COL1A2
COL2A1
COL3A1
COL4A1
COL4A2
COL4A5
COL5A1
COL5A2
COL5A3
COL6A1
COL6A2
COL6A3
COL9A1
COL9A2
COL9A3
COX7B
CTSC
DCHS1
DSE
EFEMP2
ELN
EMILIN1
FBLN5
FBN1
FBN2
FBN3
FKBP14
FLCN
FLNA
FLNB
FOXE3
GALNS
GATA5
GGCX
GLA
GORAB
GSTM1
GSTP1
GSTT1
GUCY1A3
GZF1
HCN4
HEY2
HNRNPK
IPO8
JAG1
KCNH1
KCNN1
LOX
LOXL3
LRP5
LRP6
LTBP1
LTBP2
LTBP3
LTBP4
MAT2A
MED12
MFAP5
MMP2
MYH11
MYH7
MYLK
NFIX
NKAP
NKX2-5
NOTCH1
NPR3
NSD1
OCRL
P3H2
P3H3
P3H4
P4HA1
P4HA2
PDGFRB
PIEZO2
PKD1
PKD2
PLOD1
PLOD3
PMEPA1
PRDM5
PRKG1
PYCR1
RIN2
RIN3
RNF213
ROBO3
ROBO4
SAMHD1
SECISBP2
SERPINE1
SKI
SLC2A10
SLC39A13
SMAD2
SMAD3
SMAD4
SMAD6
TAB2
TGFB1
TGFB2
TGFB3
TGFBR1
TGFBR2
THBS2
THSD4
TIMP1
TIMP3
TNXB
TPSAB1
TSR1
TWIST2
UPF3B
VCAN
VWF
XYLT1
YY1AP1
ZNF469

## Sheet: Table S5_NeuroDeg
ABCD1
AFG3L2
ALS2
ANG
ANXA11
APP
AR
ARSA
ATN1
ATP13A2
ATP1A3
ATP7B
ATXN1
ATXN10
ATXN2
ATXN3
ATXN7
ATXN8OS
AUH
C19orf12
C9orf72
CACNA1A
CACNA1G
CCNF
CHCHD10
CHCHD2
CHMP2B
CLCN2
CLN6
COASY
COL4A1
COL4A2
CP
CSF1R
CTSA
CTSF
CYLD
CYP27A1
CYP7B1
DARS2
DCTN1
DNAJC5
DNAJC6
DNMT1
EIF2B1
EIF2B2
EIF2B3
EIF2B4
EIF2B5
ELOVL4
EPM2A
ERBB4
FBXO7
FIG4
FTL
FUS
FXN
GBA
GCH1
GFAP
GLA
GRN
GSN
HEXA
HEXB
HNRNPA1
HTRA1
HTT
ITM2B
JAM2
JPH3
KCNC3
KCND3
KIF5A
LAMB1
LRRK2
LYST
MAPT
MATR3
MYORG
NHLRC1
NIPA1
NOP56
NOTCH3
NPC1
NPC2
OPA3
OPTN
PANK2
PARK7
PDGFB
PDGFRB
PFN1
PINK1
PLA2G6
PLD3
PPP2R2B
PRKN
PRKRA
PRNP
PRPH
PSEN1
PSEN2
RAB39B
RFC1
RNF216
SETX
SIGMAR1
SLC20A2
SLC30A10
SNCA
SOD1
SORL1
SPAST
SPG11
SPR
SQSTM1
STUB1
SYNJ1
TARDBP
TBK1
TBP
TMEM240
TREM2
TREX1
TTC19
TTR
TUBA4A
TUBB4A
TYROBP
UBQLN2
VAPB
VCP
VPS13A
VPS35
WDR45
XK
XPR1

## Sheet: Table S6_SKD
ABCC9
ACACA
ACAN
ACP5
ACTB
ACTG1
ACVR1
ADAMTS10
ADAMTS17
ADAMTSL2
ADGRG6
ADI1
AFF3
AFF4
AGA
AGPS
AGRN
AIFM1
AKT1
AKT2
ALG12
ALG3
ALG9
ALMS1
ALPL
ALX1
ALX3
ALX4
AMER1
AMMECR1
ANAPC1
ANAPC5
ANKH
ANKRD11
ANO5
ANTXR2
APC2
ARCN1
ARHGAP25
ARHGAP31
ARID1A
ARID1B
ARSB
ARSE
ARSK
ASAH1
ASXL1
ATP6V0A2
ATP7A
ATR
AXIN1
B3GALT6
B3GAT3
B3GLCT
B4GALT6
B4GALT7
B9D1
B9D2
BANF1
BBS1
BCL11B
BGN
BHLHA9
BMP1
BMP2
BMP4
BMP5
BMPER
BMPR1B
BNIP1
C21ORF2
C2CD3
C5orf42
CA2
CANT1
CASR
CBFB
CC2D2A
CCDC134
CCDC22
CCDC8
CCN2
CDC45
CDC6
CDC73
CDH3
CDK10
CDK5RAP2
CDKN1C
CDT1
CENPE
CENPJ
CEP120
CEP152
CEP290
CEP63
CHST11
CHST14
CHST3
CHSY1
CILK1
CKAP2L
CLCN5
CLCN7
CNOT2
COG1
COG4
COL10A1
COL11A1
COL11A2
COL1A1
COL1A2
COL27A1
COL2A1
COL9A1
COL9A2
COL9A3
COLEC10
COLEC11
COMP
COPB1
COPB2
CREB3L1
CREBBP
CRIPT
CRTAP
CSF1R
CSGALNACT1
CSPP1
CTSA
CTSC
CTSK
CUL4B
CUL7
CYP26B1
CYP27B1
CYP2R1
CYP3A4
DDR2
DDRGK1
DDX58
DDX59
DHCR24
DHCR7
DHODH
DICER1
DIP2C
DIS3L2
DLL3
DLL4
DLX3
DLX5
DLX6
DMP1
DNA2
DNAJC21
DNMT3A
DOCK6
DOLPP1
DONSON
DPM1
DPM2
DPM3
DSE
DVL1
DVL3
DYM
DYNC2H1
DYNC2LI1
EBP
EDN1
EDNRA
EED
EFL1
EFNB1
EFTUD2
EIF2AK3
EIF4A3
ELMO2
EN1
ENPP1
EOGT
EP300
EPS15L1
ERF
ERI1
ESCO2
ESR1
ETF1
EVC
EVC2
EXOC6B
EXT1
EXT2
EXTL3
EZH2
FAM111A
FAM149B1
FAM20B
FAM20C
FAM24A
FAM58A
FANCB
FAR1
FBLIM1
FBLN1
FBN1
FBN2
FBXW4
FERMT3
FGD1
FGF10
FGF16
FGF21
FGF23
FGF8
FGF9
FGFR1
FGFR2
FGFR3
FIG4
FKBP10
FKBP14
FLNA
FLNB
FMN1
FN1
FOXC1
FUCA1
FUZ
FZD2
GALNS
GALNT3
GBA1
GCM2
GDF3
GDF5
GDF6
GH1
GHR
GINS2
GJA1
GLB1
GLI1
GLI2
GLI3
GMNN
GNAI2
GNAI3
GNAS
GNPAT
GNPNAT1
GNPTAB
GNPTG
GNS
GORAB
GPC3
GPC4
GPC6
GPX4
GREM1
GRK2
GSC
GUSB
GZF1
H3-3A
HAAO
HAGLR
HDAC4
HDAC6
HDAC8
HES7
HGSNAT
HHAT
HNRNPC
HNRNPK
HOXA11
HOXA13
HOXD13
HPGD
HRAS
HS2ST1
HSPA9
HSPG2
HYAL1
HYLS1
IARS2
ID4
IDH1
IDH2
IDS
IDUA
IFIH1
IFITM5
IFT122
IFT140
IFT172
IFT27
IFT43
IFT52
IFT57
IFT74
IFT80
IFT81
IHH
IKBKG
IL11RA
IL1RN
IL6ST
IMPAD1
INPPL1
INTU
KAT6A
KAT6B
KCNJ2
KDELR2
KDM6A
KIAA0586
KIAA0753
KIAA0825
KIF22
KIF5B
KIF7
KL
KMT2D
KYNU
LAMA5
LARP7
LBR
LEMD3
LFNG
LIFR
LMBR1
LMNA
LMX1B
LONP1
LOXL3
LPIN2
LRP1
LRP4
LRP5
LRP6
LRRK1
LTBP1
LTBP2
LTBP3
LYSET
MAB21L2
MAF
MAFB
MAN2B1
MAN2C1
MANBA
MAP2K1
MAP3K20
MAP3K7
MAPKAPK5
MASP1
MATN3
MBTPS1
MBTPS2
MCM3
MCM5
MCM7
MECOM
MED16
MEGF8
MEOX1
MESD
MESP2
MET
MGP
MID1
MIR140
MIR17HG
MKS1
MMP13
MMP14
MMP2
MMP9
MNX1
MPDU1
MSGN1
MSX2
MTAP
MTX2
MYCN
MYH3
MYO18B
NADSYN1
NAGLU
NANS
NBAS
NEK1
NEK9
NEPRO
NEU1
NF1
NFIX
NIN
NIPBL
NKX3-2
NLRP3
NMNAT1
NOG
NOTCH1
NOTCH2
NPHP3
NPPC
NPR2
NPR3
NRAS
NSD1
NSDHL
NSMCE2
NXN
OBSL1
OFD1
ORC1
ORC4
ORC6
OSTM1
P3H1
P4HB
PAM16
PAN2
PAPSS2
PAX3
PCNT
PCSK5
PCYT1A
PDE3A
PDE4D
PDGFRB
PEX5
PEX7
PGAP3
PGM3
PHEX
PHF6
PHGDH
PIGQ
PIGT
PIGV
PIK3C2A
PIK3CA
PIK3R1
PIN1
PIR
PISD
PITX1
PKDCC
PLAG1
PLCB3
PLCB4
PLEKHM1
PLK4
PLOD1
PLOD2
PLS3
POC1A
POLE
POLR1A
POLR1B
POLR1C
POLR1D
POLR3A
POLR3B
POLR3GL
POP1
POR
PORCN
PPIB
PPP3CA
PRG4
PRKACA
PRKACB
PRKAR1A
PRKG2
PRMT7
PRRX1
PSAT1
PSPH
PTDSS1
PTH1R
PTHLH
PTPN11
PUF60
PYCR1
RAB23
RAB33B
RAB34
RAB3GAP2
RAC3
RAD21
RARG
RASGRP2
RBBP8
RBM10
RBM8A
RBPJ
RECQL4
RFLNA
RFT1
RIN1
RINT1
RIPPLY2
RMRP
RNU12
RNU4ATAC
ROR2
RPGRIP1L
RPL13
RSPO2
RSPRY1
RUNX2
SALL1
SALL4
SATB2
SBDS
SCARF2
SCUBE3
SCYL1
SEC23A
SEC24D
SEM1
SEMA3A
SERPINF1
SERPINH1
SETD2
SF3B4
SFRP4
SGK3
SGMS2
SGSH
SGSM2
SH3BP2
SH3PXD2B
SHH
SHOX
SIK3
SIX1
SIX2
SKI
SLC10A7
SLC13A1
SLC17A5
SLC25A24
SLC26A2
SLC29A3
SLC34A1
SLC34A3
SLC35A2
SLC35B2
SLC35D1
SLC39A13
SLC4A2
SLCO2A1
SLCO5A1
SMAD2
SMAD3
SMAD4
SMAD6
SMAD7
SMARCA2
SMARCA4
SMARCAL1
SMARCB1
SMARCE1
SMC1A
SMC3
SMCHD1
SMO
SMOC1
SMOC2
SMS
SNRPB
SNX10
SON
SOST
SOX11
SOX9
SP7
SPAG17
SPARC
SPECC1L
SQSTM1
SRCAP
SRP54
SUCO
SULF1
SUMF1
SUZ12
TAB2
TALDO1
TAPT1
TBC1D24
TBCE
TBX15
TBX3
TBX4
TBX5
TBX6
TBXAS1
TCF12
TCIRG1
TCOF1
TCTEX1D2
TCTN2
TCTN3
TENT5A
TERT
TFAP2B
TGDS
TGFB1
TGFB2
TGFB3
TGFBR1
TGFBR2
THOC6
THPO
TMCO1
TMEM165
TMEM216
TMEM231
TMEM263
TMEM38B
TMEM53
TMEM67
TNFRSF11A
TNFRSF11B
TNFSF11
TOGARAM1
TOMM7
TONSL
TOP2B
TP63
TRAF3IP1
TRAF7
TRAIP
TRAPPC2
TREM2
TRIM37
TRIP11
TRPS1
TRPV4
TRPV6
TTC21B
TWIST1
TXNL4A
TYROBP
UBA2
UFSP2
USP9X
VAC14
VDR
VPS33A
VPS35L
WDR19
WDR34
WDR35
WDR60
WISP3
WLS
WNT1
WNT10B
WNT3
WNT3A
WNT5A
WNT6
WNT7A
XRCC4
XYLT1
XYLT2
ZBTB16
ZIC1
ZIC3
ZMAT2
ZMPSTE24
ZNF462
ZSWIM6

## Sheet: Table S7_ICC
ABCC9
ACTC1
ACTN2
ALMS1
ALPK3
BAG3
CACNA1C
CACNA1D
CACNA2D1
CACNB2
CALM1
CALM2
CALM3
CASQ2
CAV3
CNBP
COX15
CRYAB
CSRP3
DES
DMD
DMPK
DSC2
DSG2
DSP
EMD
FHL1
FHOD3
FLNC
FXN
GAA
GJA5
GLA
GNB2
GNB5
GPD1L
HCN4
JPH2
JUP
KCNA5
KCND3
KCNE1
KCNE2
KCNE3
KCNE5
KCNH2
KCNJ2
KCNJ5
KCNJ8
KCNQ1
LAMP2
LDB3
LMNA
MYBPC3
MYH7
MYL2
MYL3
MYL4
MYO6
NEXN
NKX2-5
NPPA
PKP2
PLN
PRDM16
PRKAG2
PTPN11
RAF1
RANGRF
RBM20
RIT1
RYR2
SCN10A
SCN1B
SCN2B
SCN3B
SCN5A
SGO1
SLC25A4
SLMAP
TAFAZZIN
TBX5
TECRL
TMEM43
TNNC1
TNNI3
TNNI3K
TNNT2
TPM1
TRDN
TRPM4
TTN
TTR
VCL

## Sheet: Table S8_Hydrops
AARS2
ABCC6
ACAD9
ACTA1
ACTB
ACTG1
ADA2
ADAMTS3
AGGF1
AHCY
AHI1
ALG1
ALG12
ALG8
ALG9
ALPK3
ANGPT2
ANKRD11
AP3B1
ARSB
ASAH1
ASCC1
ATP11C
ATP1A2
ATR
BICD2
BMP2
BRAF
BSND
CACNA1C
CALCRL
CANT1
CARS2
CASP10
CBL
CCBE1
CCNK
CDAN1
CDC42
CDK10
CELSR1
CEP55
CHD7
CHRNA1
CHRND
CHRNG
CLCNKA
CLCNKB
CNTN1
COG6
COL11A1
COL1A1
COL1A2
COL2A1
CRLS1
CTSA
CYBB
CYP11A1
CYP21A2
DHCR24
DHCR7
DMPK
DNAH9
DOK7
DPM1
DYNC1H1
DYNC2H1
EBP
EHBP1L1
ENPP1
EP300
EPB41
EPHB4
ERCC5
ESAM
FAS
FASLG
FAT4
FBXW11
FGD1
FGFR3
FH
FIG4
FKTN
FLNA
FLNB
FLT4
FLVCR2
FOXC2
FOXF1
FOXP3
FRAS1
FREM2
FZD6
G6PD
GAA
GALC
GALNS
GATA1
GATA2
GATA5
GATB
GATC
GBA
GBE1
GLA
GLB1
GLDN
GLE1
GLMN
GLUL
GNPTAB
GPI
GRIN2B
GRIP1
GUSB
GYPC
HADH
HADHA
HADHB
HBA1
HBA2
HBZ
HEATR3
HK1
HNRNPK
HRAS
HSPD1
HSPG2
IDUA
IFT122
IFT80
IKBKG
IKZF1
INPPL1
INVS
ITGA9
ITPR1
KAT6B
KCNH2
KCNJ1
KCTD1
KDM6A
KIAA0586
KIAA1109
KIDINS220
KIF20A
KIF23
KLF1
KLHL40
KMT2D
KRAS
KRIT1
LAMB2
LARS2
LBR
LIPA
LMOD3
LRBA
LRP6
LYN
LYST
LZTR1
MAGED2
MAP2K1
MAP2K2
MAP3K8
MAP4K4
MAPK1
MCM10
MDFIC
MECOM
MED12
MED13L
MESD
MGAT2
MID1
MKKS
MMACHC
MRAS
MRPS16
MRPS22
MT-TE
MT-TL1
MUSK
MVK
MYBPC3
MYH3
MYH7
MYRF
MYSM1
NDUFB10
NEB
NEK1
NEK9
NEU1
NEXN
NF1
NF2
NIPBL
NPC1
NPC2
NPL
NR1H4
NRAS
NSF
NSUN2
PEX1
PEX10
PEX11B
PEX12
PEX13
PEX14
PEX16
PEX19
PEX2
PEX26
PEX3
PEX5
PEX6
PEX7
PHGDH
PIEZO1
PIGA
PIGN
PIK3CA
PKD1L1
PKLR
PKP2
PLD1
PMM2
POU3F3
PPP1CB
PPP3CA
PRF1
PRKAG2
PRKCD
PROC
PSAT1
PTCH1
PTH1R
PTPN11
QRSL1
RAB27A
RAF1
RAPSN
RARS2
RASA1
RASA2
RASGRP1
RFWD3
RHD
RIPK4
RIT1
RNASEH2B
RPL11
RPL15
RPL18
RPL27
RPL31
RPL35
RPL35A
RPL5
RPL8
RPL9
RPS10
RPS15A
RPS17
RPS19
RPS20
RPS24
RPS26
RPS27
RPS28
RPS29
RPS7
RRAS
RRAS2
RYR1
SASH1
SCN2A
SCN4A
SCN5A
SEC23B
SERPINA11
SF3B4
SGPL1
SH2D1A
SHOC2
SLC12A1
SLC17A5
SLC22A5
SLC25A26
SLC26A2
SLC30A5
SLC35D1
SLC4A1
SLC6A9
SMARCB1
SMN1
SMN2
SMPD1
SOS1
SOS2
SOX18
SPRED1
SPRED2
SPTA1
SPTB
STAMBP
STAT3
STT3B
STX11
STXBP2
SUMF1
SUZ12
SYNGAP1
TAB2
TALDO1
TAPT1
TAZ
THSD1
TPM2
TRIM37
TRIP11
TRNT1
TSC2
TSR2
UNC13D
UROD
UROS
VAC14
WAC
WDFY3
WDR19
WDR34
WDR35
WDR60
WDR81
WNT7A
WT1
XIAP
ZEB2

## Sheet: Table S9_IEM
AARS1
AARS2
AASS
ABAT
ABCB7
ABCC8
ABCD1
ABCD4
ABHD12
ABHD16A
ABHD5
ACACA
ACAD8
ACAD9
ACADM
ACADS
ACADSB
ACADVL
ACAT1
ACBD5
ACER3
ACO2
ACOX1
ACSF3
ACY1
ADA
ADAR
ADCK2
ADCY5
ADK
ADPRS
ADSL
ADSS1
AFG2A
AFG2B
AFG3L2
AGA
AGK
AGL
AGO1
AGPS
AGTPBP1
AGXT
AHCY
AIFM1
AIMP1
AIMP2
ALAD
ALAS2
ALDH18A1
ALDH1L2
ALDH3A2
ALDH4A1
ALDH5A1
ALDH6A1
ALDH7A1
ALDOA
ALDOB
ALG1
ALG11
ALG12
ALG13
ALG14
ALG2
ALG3
ALG6
ALG8
ALG9
ALKBH1
ALMS1
ALPL
ALS2
AMACR
AMN
AMPD1
AMPD2
AMT
ANO10
ANTXR2
AP1S1
AP3B1
AP3D1
AP5Z1
APOO
APRT
ARF3
ARG1
ARL3
ARNT2
ARSA
ARSB
ARSK
ASAH1
ASL
ASNS
ASPA
ASS1
ASXL3
ATAD3A
ATAD3B
ATAD3C
ATIC
ATP11A
ATP13A2
ATP1A1
ATP1A3
ATP2B1
ATP2B2
ATP5F1A
ATP5F1B
ATP5F1D
ATP5F1E
ATP5MC3
ATP5MK
ATP5PO
ATP6AP1
ATP6V0A2
ATP7A
ATP7B
ATP9A
ATPAF2
AUH
B3GALNT2
B4GALNT1
B4GALT1
B4GALT7
BBOX1
BCAP31
BCAT2
BCKDHA
BCKDHB
BCKDK
BCS1L
BICRA
BICRAL
BLOC1S3
BLOC1S6
BOLA3
BSCL2
BTD
C19orf12
C1QBP
C2orf69
CA5A
CACNA1A
CACNA1E
CACNA1S
CAD
CAMLG
CAMSAP1
CARS1
CARS2
CAT
CBLIF
CBS
CCDC115
CCDC174
CCDC88C
CD320
CEP89
CERS1
CHCHD10
CHKA
CHKB
CIAO1
CISD2
CLCN2
CLCN6
CLCN7
CLDN11
CLDN16
CLN3
CLN5
CLN6
CLN8
CLPB
CLPP
CLPX
CLTC
CLTRN
CMPK2
CNKSR2
COA3
COA5
COA6
COA7
COA8
COASY
COG1
COG2
COG3
COG4
COG5
COG6
COG7
COG8
COLGALT1
COQ2
COQ4
COQ5
COQ6
COQ7
COQ8A
COQ9
COX10
COX11
COX14
COX15
COX16
COX18
COX20
COX4I1
COX4I2
COX5A
COX6A1
COX6A2
COX6B1
COX7B
COX8A
CP
CPOX
CPS1
CPT1A
CPT2
CRAT
CRLS1
CRNKL1
CRPPA
CSF1R
CTCF
CTH
CTNS
CTSA
CTSD
CTSF
CTSK
CTU2
CUBN
CWF19L1
CYC1
CYP7B1
D2HGDH
DARS1
DARS2
DBH
DBT
DCAF17
DDC
DDOST
DEGS1
DGAT1
DGUOK
DHCR24
DHCR7
DHDDS
DHFR
DHODH
DHPS
DHTKD1
DIAPH1
DKC1
DLAT
DLD
DMGDH
DNA2
DNAJC12
DNAJC19
DNAJC3
DNAJC30
DNAJC5
DNM1L
DOHH
DOLK
DPAGT1
DPM1
DPM2
DPM3
DPYD
DPYS
DTNBP1
DTYMK
EARS2
EBF3
EBP
ECHS1
ECM1
ECSIT
EDEM3
EIF2B1
EIF2B2
EIF2B3
EIF2B4
EIF2B5
ELAC2
ELOVL4
ELOVL5
ENO3
EPG5
EPHX1
EPM2A
EPRS1
ERAL1
ERCC2
ERCC6
ESAM
ETFA
ETFB
ETFDH
ETHE1
EXOSC3
EXOSC5
EXOSC8
EXT2
FA2H
FAH
FAM126A
FAM149B1
FAR1
FARS2
FARSA
FARSB
FASTKD2
FBP1
FBXL4
FBXO11
FBXW7
FCSK
FDFT1
FDX2
FDXR
FECH
FH
FIG4
FLAD1
FMO3
FOLR1
FOXI1
FOXRED1
FTCD
FTL
FUCA1
FUT8
FXN
G6PC
GAA
GABBR2
GABRG2
GALC
GALE
GALK1
GALM
GALNS
GALNT2
GALNT3
GALT
GAMT
GARS1
GATB
GATC
GATM
GBA
GBA2
GBE1
GBF1
GCDH
GCH1
GCK
GCLC
GCSH
GET3
GET4
GFAP
GFER
GFM1
GFM2
GGT1
GJC2
GK
GLA
GLB1
GLDC
GLRA1
GLRA2
GLRX5
GLS
GLUD1
GLUL
GLYCTK
GM2A
GMPPA
GMPPB
GNAO1
GNB1
GNE
GNMT
GNPAT
GNPTAB
GNPTG
GNS
GOLGA2
GOT2
GPHN
GPR161
GPRC5B
GRHPR
GRIN2B
GRN
GSS
GSX2
GTPBP3
GUSB
GYG1
GYG2
GYS1
GYS2
HAAO
HACE1
HADH
HADHA
HADHB
HAL
HARS1
HCFC1
HECW2
HEPACAM
HERC2
HEXA
HEXB
HGD
HGSNAT
HIBCH
HIKESHI
HK1
HLCS
HMBS
HMGCL
HMGCS2
HOGA1
HPD
HPDL
HPRT1
HPS1
HPS3
HPS4
HPS5
HPS6
HSD17B10
HSD17B4
HSPD1
HSPE1
HTRA2
HYAL1
HYOU1
IARS1
IARS2
IBA57
IDH2
IDH3A
IDI1
IDS
IDUA
IER3IP1
IFIH1
INPP5K
INSR
INTS11
IRF2BPL
ISCA1
ISCA2
ISCU
ITPA
ITPR1
IVD
JAG1
JAM2
KARS1
KCNA4
KCNJ11
KCNK3
KGD4
KIF5A
KYNU
L2HGDH
LAMA1
LAMP2
LARS1
LARS2
LBR
LDHA
LETM1
LHX4
LIAS
LIG3
LIPA
LIPE
LIPT1
LIPT2
LMBRD1
LMBRD2
LNPK
LONP1
LPIN1
LRP2
LRPPRC
LSM11
LYRM4
LYRM7
MADD
MAG
MAGED2
MAGEL2
MAGT1
MAL
MAN1B1
MAN2B1
MAN2C1
MANBA
MAOA
MAPK8IP3
2025-03-01
2025-03-02
MAT1A
MBD5
MBOAT7
MCAT
MCCC1
MCCC2
MCEE
MCM7
MCOLN1
MDH1
MECP2
MECR
MED22
MED27
MFF
MFN2
MFSD8
MGAT2
MGME1
MICOS10
MICOS13
MICU1
MICU2
MIEF2
MIPEP
MLC1
MLPH
MLYCD
MMAA
MMAB
MMACHC
MMADHC
MMS19
MMUT
MOCOS
MOCS1
MOCS2
MOCS3
MOGS
MORC2
MPC1
MPDU1
MPI
MPV17
MRM2
MRPL12
MRPL24
MRPL3
MRPL38
MRPL39
MRPL44
MRPL57
MRPS14
MRPS16
MRPS2
MRPS22
MRPS23
MRPS25
MRPS34
MRPS7
MSL2
MSL3
MSTO1
MTFMT
MTHFD1
MTHFR
MTO1
MTPAP
MTR
MTRFR
MTRR
MTSS2
MVK
MYH7
MYO5A
MYORG
NAA10
NADK2
NAE1
NAGA
NAGLU
NAGS
NALCN
NANS
NARS1
NARS2
NAXD
NAXE
NBAS
NDST1
NDUFA1
NDUFA10
NDUFA11
NDUFA12
NDUFA13
NDUFA2
NDUFA4
NDUFA6
NDUFA8
NDUFA9
NDUFAF1
NDUFAF2
NDUFAF3
NDUFAF4
NDUFAF5
NDUFAF6
NDUFAF8
NDUFB1
NDUFB10
NDUFB11
NDUFB3
NDUFB6
NDUFB7
NDUFB8
NDUFB9
NDUFC2
NDUFS1
NDUFS2
NDUFS3
NDUFS4
NDUFS5
NDUFS6
NDUFS7
NDUFS8
NDUFV1
NDUFV2
NDUFV3
NEU1
NFASC
NFE2L2
NFS1
NFU1
NGLY1
NKX6-2
NMNAT1
NOP10
NOTCH1
NOTCH3
NPC1
NPC2
NR4A2
NRCAM
NRROS
NSDHL
NSRP1
NSUN3
NT5C3A
NUBPL
NUP188
NUP214
NUP62
NUS1
OAT
OCRL
OGDH
OGDHL
OPA1
OPA3
OPLAH
OSTC
OTC
OXA1L
OXCT1
OXR1
P4HTM
PAH
PAICS
PAK1
PANK2
PARK7
PARS2
PAX7
PAXBP1
PC
PCBD1
PCCA
PCCB
PCK1
PCK2
PCLO
PCYT1A
PDE10A
PDE12
PDE2A
PDHA1
PDHB
PDHX
PDK3
PDP1
PDSS1
PDSS2
PDXK
PEPD
PET100
PET117
PEX1
PEX10
PEX11B
PEX12
PEX13
PEX14
PEX16
PEX19
PEX2
PEX26
PEX3
PEX5
PEX6
PEX7
PFKM
PGAM2
PGAP2
PGK1
PGM1
PGM3
PHGDH
PHKA1
PHKA2
PHKB
PHKG2
PHYH
PI4KA
PIGA
PIGM
PIGN
PIGO
PIGQ
PIGS
PIGT
PIGV
PIGW
PIK3R4
PITRM1
PLA2G6
PLAA
PLP1
PMM2
PMPCA
PMPCB
PNP
PNPLA2
PNPLA4
PNPLA6
PNPLA8
PNPO
PNPT1
POLG
POLG2
POLR1A
POLR1C
POLR3A
POLR3B
POLRMT
POMGNT1
POMT1
PPA2
PPCDC
PPCS
PPFIBP1
PPM1K
PPOX
PPP1R15B
PPP1R21
PPP2R1A
PPP2R5D
PPT1
PRKAG2
PRKN
PRMT7
PRODH
PRODH2
PRORP
PRPS1
PRUNE1
PSAP
PSAT1
PSPH
PTCD1
PTCD3
PTRH2
PTS
PURA
PUS1
PUS7
PYCR1
PYCR2
PYGL
PYGM
PYROXD1
QARS1
QDPR
QRSL1
RAB11B
RAB18
RAB27A
RAB3GAP1
RAB3GAP2
RALGAPA1
RANBP2
RARS1
RARS2
RBCK1
REPS1
RFT1
RMND1
RNASEH1
RNASEH2A
RNASEH2B
RNASEH2C
RNASET2
RNF13
RNF213
RNF220
RNH1
RNU4-2
RNU7-1
RPIA
RRM1
RRM2B
RTN4IP1
RYR1
SAMHD1
SARS1
SARS2
SC5D
SCAF4
SCN8A
SCO1
SCO2
SCP2
SCYL1
SDHA
SDHAF1
SDHAF2
SDHB
SDHC
SDHD
SELENOI
SEMA6B
SERAC1
SF3B1
SFXN4
SGSH
SHMT2
SHQ1
SIL1
SLC13A3
SLC16A1
SLC16A2
SLC17A5
SLC19A2
SLC19A3
SLC1A1
SLC1A4
SLC20A2
SLC22A12
SLC22A5
SLC25A1
SLC25A10
SLC25A12
SLC25A13
SLC25A15
SLC25A19
SLC25A20
SLC25A21
SLC25A22
SLC25A24
SLC25A26
SLC25A3
SLC25A32
SLC25A36
SLC25A4
SLC25A42
SLC25A46
SLC27A4
SLC2A1
SLC2A2
SLC2A9
SLC30A10
SLC30A5
SLC30A9
SLC31A1
SLC33A1
SLC35A1
SLC35A2
SLC35C1
SLC37A4
SLC38A3
SLC39A14
SLC39A4
SLC39A8
SLC3A1
SLC44A1
SLC46A1
SLC4A10
SLC4A11
SLC52A1
SLC52A2
SLC52A3
SLC5A1
SLC5A2
SLC5A7
SLC6A17
SLC6A19
SLC6A3
SLC6A8
SLC6A9
SLC7A2
SLC7A7
SLC7A9
SLC9A1
SLC9A7
SLIRP
SMARCD1
SMG9
SMPD1
SMPD4
SMS
SNAPC4
SNIP1
SNORD118
SNX14
SOD1
SOD2
SORD
SPG7
SPR
SPTBN4
SPTSSA
SQOR
SQSTM1
SRD5A3
SSBP1
SSR4
ST3GAL5
STAT2
STT3A
STT3B
STX3
STXBP5L
SUCLA2
SUCLG1
SUFU
SUGCT
SUMF1
SUOX
SURF1
SVBP
SYT1
SZT2
TACO1
TAF1
TAF8
TALDO1
TAMM41
TANGO2
TAOK1
TARS2
TAT
TAZ
TBC1D20
TBCD
TBCK
TBL1X
TCN1
TCN2
TDO2
TEFM
TFAM
TFE3
TH
THAP11
THUMPD1
TIAM1
TIMM22
TIMM50
TIMM8A
TIMMDC1
TK2
TKFC
TKT
TMEM106B
TMEM126A
TMEM126B
TMEM163
TMEM165
TMEM184B
TMEM199
TMEM240
TMEM260
TMEM63A
TMEM65
TMEM70
TMLHE
TMTC3
TNNI3
TOMM70
TOP3A
TPI1
TPK1
TPP1
TPR
TRAPPC11
TRAPPC12
TRAPPC2L
TRAPPC9
TREX1
TRIAP1
TRIM37
TRIT1
TRMT1
TRMT10C
TRMT5
TRMU
TRNT1
TRPM6
TSEN54
TSFM
TTC19
TTI1
TTPA
TUBA1A
TUBB
TUBB2A
TUBB3
TUBB4A
TUBB4B
TUFM
TWNK
TXN2
TYMP
UBQLN2
UBTF
UFM1
UMPS
UNC80
UPB1
UQCC2
UQCC3
UQCRB
UQCRC2
UQCRFS1
UQCRH
UQCRQ
UROC1
UROD
UROS
USP7
VAC14
VAMP2
VARS1
VARS2
VMA21
VPS11
VPS13C
VPS13D
VPS16
VPS33A
VPS4A
VPS50
VPS51
VPS53
WARS1
WARS2
WDR45
WDR45B
WFS1
WIPI2
WWOX
XDH
XPR1
YARS1
YARS2
YIF1B
YME1L1
ZBTB42
ZNF526
ZNHIT3

[truncated: 9 more sheets: Table S10_NBS-M, Table S11_DIAB, Table S12_PEDHEP, Table S13_EP, Table S14_PID , Table S15_AID, Table S16_IBMFS, Table S17_Small variants, Table S18_Structural variants]
